# Supplementary material for: Study of Structural Transformation and Chemical Reactivity of Kaolinite-Based High Ash Slime during Calcination
Source: MDPI journal article supplement (doi:10.3390/min13040466), 2023-03-26

---

## **Supplementary Information**

# **Study of Structural Transformation and Chemical Reactivity of Kaolinite-Based High Ash Slime during Calcination**

**Hongfei Xue, Xianshu Dong \*, Yuping Fan, Xiaomin Ma and Suling Yao**

College of Mineral Processing Engineering, Taiyuan University of Technology,  
No. 79 Yingze West Street, Taiyuan 030024, China

\* Correspondence: [dongxianshu@tyut.edu.cn](mailto:dongxianshu@tyut.edu.cn)

---

## Supplementary Caption

Supplementary methods

Reaction for carbon reacted with  $O_2$

Reaction for char gasification with  $CO_2$

Reaction for minerals under calcination

---

## Supplementary methods

### Determination of active Al<sub>2</sub>O<sub>3</sub> and SiO<sub>2</sub> contents.

The chemical reactivity of coal tailings, i.e., the chemical reactivity of aluminum and silicon in coal tailings, was evaluated by hydrochloric acid and sodium hydroxide leaching methods. The specific test methods are as follows (step 1-4):

#### Step 1: Preparation of Al<sub>2</sub>O<sub>3</sub> leaching solution

Coal tailings was treated with boiling 25 wt.% HCl solution at a solids ratio of 20% for 2 h. After treatment, reactive Al<sub>2</sub>O<sub>3</sub> was leached, while SiO<sub>2</sub> and unreacted Al<sub>2</sub>O<sub>3</sub> remained in the solid residue. Then, the suspensions were filtered by a suction filter system, and the solid residue were rinsed with deionized water repeatedly until the pH of the rinse water becomes neutral. The main reaction during the acid leaching process took place below:

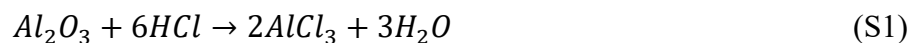

Step 2: Ethylenediaminetetraacetic acid (EDTA) titration methods for determination of Al<sub>2</sub>O<sub>3</sub> leaching rate

First, the Al<sub>2</sub>O<sub>3</sub> leaching solution from step 1 was mixed with excessive EDTA solution. Then, the EDTA that has not been consumed by Al<sup>3+</sup> was back-titrated with a known concentration of Cu<sup>2+</sup> solution to the endpoint, using 1-(2-pyridylazo)-2-naphthol (PAN) as an indicator. The titration reaction is as follows:

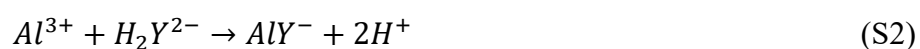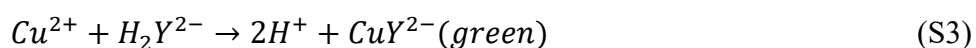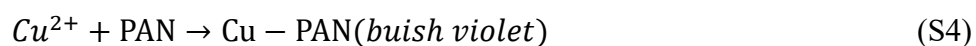

---

where  $H_2Y^{2-}$  is on behalf of EDTA molecules. The content of leached  $Al_2O_3$  was obtained by the amount of EDTA that react with the  $Al^{3+}$ .

Step 3: Preparation of reaction  $SiO_2$  leaching solution

Reactive  $SiO_2$  in the solid residue from step 1 can be leached after treatment with boiling 25 wt.% NaOH solution at a solids ratio of 20% for 2 h. The reaction is as follows:

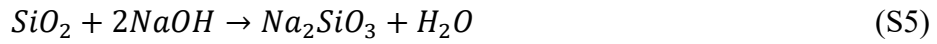

Step 4: alkali-soluble carbon methods for determination of  $SiO_2$  leaching rate

The reactive  $SiO_2$  was precipitated as  $H_2SiO_3$  when  $CO_2$  was passed into the  $SiO_2$  leaching solution from step 3. After the reaction, the precipitate was filtered and HCl solution was continuously sprayed to the filter cake to remove the impurities until the filter cake had no bubble. The filter cake was then washed and dried. Finally, the content of leached  $SiO_2$  was obtained by weighing the mass of the filter cake.

The relevant reactions during the process are as follows:

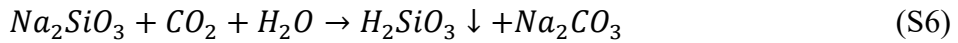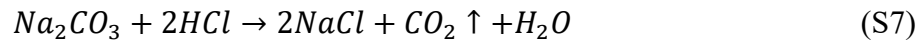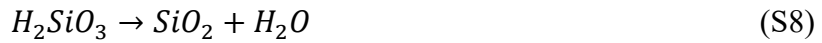

The leaching rate ( $X$ ) of  $Al_2O_3$  and  $SiO_2$  in coal tailings can be calculated according to the formula (S9).

$$X = m_1/m_0 \times 100\% \quad (S9)$$

where  $m_1$  is the amount of  $Al_2O_3$  or  $SiO_2$  in the leachate (g),  $m_0$  is the amount of  $Al_2O_3$  or  $SiO_2$  in the coal tailings (g).

---

**Reaction for carbon reacted with O<sub>2</sub>:**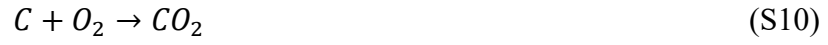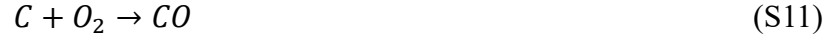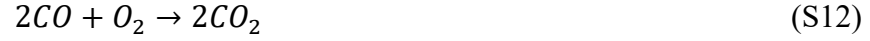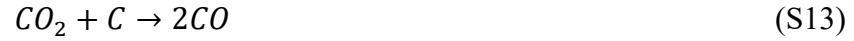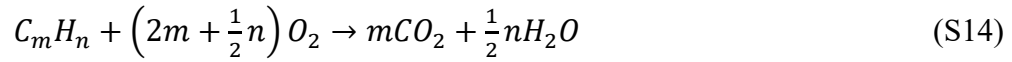**Reaction for char gasification with CO<sub>2</sub>**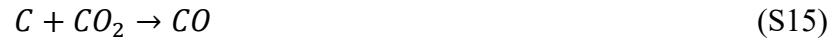**Reaction for minerals under calcination**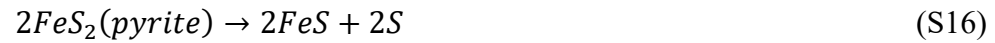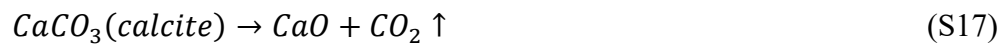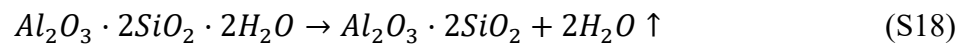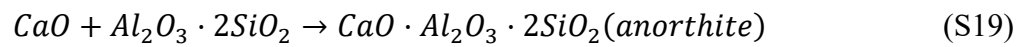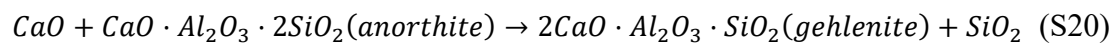

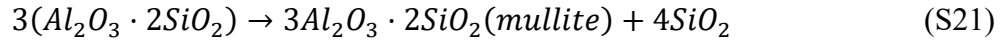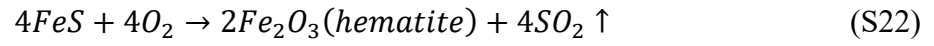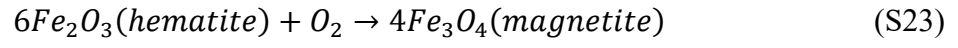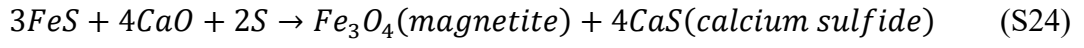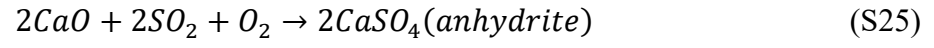

Supplement: s1 [file s1]
